# Supplementary material for: Transition metal phosphide-based oxygen electrocatalysts for aqueous zinc–air batteries
Source: Royal Society of Chemistry journal article supplement (doi:10.1039/d4cc05498a), 2024-12-26
Supplement: d4cc05498a1.pdf [file d4cc05498a1.pdf]

*Electronic Supplementary Information*

**Transition Metal Phosphide-based Oxygen Electrocatalysts for Aqueous Zinc-Air Batteries**

Santanu Ghora, Rishika Chakraborty, Saheb Bag, Mopidevi Manikanta Kumar, C. Retna Raj\*

Functional Materials and Electrochemistry Lab, Department of Chemistry, Indian Institute of Technology Kharagpur, Kharagpur, 721302, West Bengal, India.

E-mail: [crraj@chem.iitkgp.ac.in](mailto:crraj@chem.iitkgp.ac.in)

**Table S1.** List of TMPs synthesizes using electrochemical technique.

| Catalyst           | Deposition technique & deposition time                       | Potential/ Current/ Frequency                                                               | P source                                                | Additive                                | Current collector   | Ref. |
|--------------------|--------------------------------------------------------------|---------------------------------------------------------------------------------------------|---------------------------------------------------------|-----------------------------------------|---------------------|------|
| Ni-Co-Mn phosphide | 3E <sup>a</sup><br>Galvanostatic<br>2.5 h                    | -10 mA cm <sup>-2</sup>                                                                     | NaH <sub>2</sub> PO <sub>2</sub> ·<br>H <sub>2</sub> O  | Pluronic<br>P123,<br>NH <sub>4</sub> Cl | Ni foam             | 1    |
| NiCoP/CC           | 2E<br>DC voltage<br>60 min                                   | -2.0 V                                                                                      | NaH <sub>2</sub> PO <sub>2</sub> ·<br>6H <sub>2</sub> O | -                                       | Carbon<br>cloth     | 2    |
| Ni-Fe-P            | 3E <sup>b</sup><br>Pulse<br>600-2400 s                       | -0.3 to -1.2 V; 0.01,<br>0.1, 1 Hz                                                          | NaH <sub>2</sub> PO <sub>2</sub> ·<br>H <sub>2</sub> O  | Trisodium<br>citrate<br>dehydrate       | Copper<br>substrate | 3    |
| NiFeP/NM           | 2E<br>Monopulse<br>0-2400 s                                  | 50 and 250 mA cm <sup>-2</sup> ;<br>50 Hz, 35 Hz, 0.5 Hz,<br>0.05 Hz                        | NaH <sub>2</sub> PO <sub>2</sub> ·<br>H <sub>2</sub> O  | NH <sub>4</sub> Cl                      | Ni mesh             | 4    |
| Ni-Cu-P@Ni-Cu      | 2E and 3E <sup>b</sup><br>Galvanostatic<br>and CV<br>4.8 min | 2 A cm <sup>-2</sup> ;<br>-0.4 to -1.4 V@20 mV<br>s <sup>-1</sup> for 10-50 cycles          | NaH <sub>2</sub> PO <sub>2</sub> ·<br>H <sub>2</sub> O  | Trisodium<br>citrate<br>dehydrate       | Ni foam             | 5    |
| FeMnS/FeMnP/NF     | 3E <sup>a</sup><br>CV                                        | -1.2 to 0.2 V @5 mV<br>s <sup>-1</sup> for 20 and 30<br>cycles                              | NaH <sub>2</sub> PO <sub>2</sub> ·<br>H <sub>2</sub> O  | -                                       | Ni foam             | 6    |
| FeP                | 3E <sup>b</sup><br>Potentiostatic<br>360 s                   | -1.7 V for 120 s, then<br>immediately switched<br>into -0.1 V for 240 s<br>(Repeat 7 times) | NaH <sub>2</sub> PO <sub>2</sub>                        | Formic<br>acid<br>(1 vol.%)             | Cu Foil             | 7    |
| Ni-P               | 3E <sup>a</sup><br>Galvanostatic<br>15 min                   | -250 mA                                                                                     | NaH <sub>2</sub> PO <sub>2</sub> ·<br>H <sub>2</sub> O  | -                                       | Ni Foam             | 8    |

|                                               |                                                            |                                                           |                                                                     |                                                                        |                                 |    |
|-----------------------------------------------|------------------------------------------------------------|-----------------------------------------------------------|---------------------------------------------------------------------|------------------------------------------------------------------------|---------------------------------|----|
| Ni-Co-P                                       | 3E <sup>b</sup><br>CV<br>10 cycles                         | -0.2 to -1.3 V@20<br>mV/s                                 | NaH <sub>2</sub> PO <sub>2</sub> ·<br>H <sub>2</sub> O              | Trisodium<br>citrate<br>dehydrate                                      | Ni<br>nanosheets/<br>Ni<br>Foam | 9  |
| Co-P                                          | 3E<br>Galvanostatic<br>60 s                                | 2.0 A·cm <sup>-2</sup>                                    | NaH <sub>2</sub> PO <sub>2</sub>                                    | C <sub>7</sub> H <sub>5</sub> NO <sub>3</sub> S                        | Ni Foam                         | 10 |
| Cu-Co-P <sub>x</sub>                          | 2E<br>DHBT<br>(Galvanostatic)<br>20 s                      | 2.0 A·cm <sup>-2</sup>                                    | NaH <sub>2</sub> PO <sub>2</sub>                                    | -                                                                      | Stainless<br>steel foil         | 11 |
| Ni-Mo-P                                       | 3E <sup>b</sup><br>Galvanostatic<br>60 min                 | -60 mA cm <sup>-2</sup>                                   | NaH <sub>2</sub> PO <sub>2</sub> ·<br>H <sub>2</sub> O,             | C <sub>6</sub> H <sub>5</sub> Na <sub>3</sub> O<br>7·2H <sub>2</sub> O | Ni Foam                         | 12 |
| Co <sub>2</sub> P                             | 3E <sup>b</sup><br>Potentiostatic<br>10 min                | -1.0 V                                                    | NaH <sub>2</sub> PO <sub>2</sub> ·<br>H <sub>2</sub> O              | -                                                                      | Ni Foam                         | 13 |
| NiP                                           | 3E <sup>a</sup><br>Potentiostatic<br>300 s                 | -1.0 V                                                    | NaPO <sub>2</sub> H <sub>2</sub>                                    | 3-MPA                                                                  | Ni Foam                         | 14 |
| Ni-Co-P                                       | 3E <sup>b</sup><br>Galvanostatic                           | 350 mA cm <sup>-2</sup>                                   | H <sub>3</sub> PO <sub>3</sub> ,<br>H <sub>3</sub> PO <sub>4</sub>  | -                                                                      | Circular<br>copper<br>foil      | 15 |
| NiMoP/CuF                                     | 2E and 3E <sup>a</sup><br>Galvanostatic<br>2 min,<br>5 min | 160 mA cm <sup>-2</sup> , 100–<br>180 mA cm <sup>-2</sup> | Na <sub>2</sub> H <sub>2</sub> PO <sub>4</sub><br>·H <sub>2</sub> O | Sodium<br>citrate<br>tribasic<br>dihydrate                             | Copper<br>foam                  | 16 |
| Co–<br>P/Fe <sub>3</sub> O <sub>4</sub> @NF   | 3E <sup>a</sup><br>Galvanostatic<br>25 min                 | -8 mA cm <sup>-2</sup>                                    | NaH <sub>2</sub> PO <sub>2</sub> ·<br>H <sub>2</sub> O              | -                                                                      | Ni foam                         | 17 |
| g-C <sub>3</sub> N <sub>4</sub> /NiCoP/<br>NF | 3E <sup>c</sup><br>Potentiostatic<br>50-400 s              | -1.0 V                                                    | NaH <sub>2</sub> PO <sub>2</sub>                                    | NH <sub>4</sub> Cl                                                     | Ni foam                         | 18 |

|                      |                                             |                   |                                                                                             |   |         |    |
|----------------------|---------------------------------------------|-------------------|---------------------------------------------------------------------------------------------|---|---------|----|
| Ni <sub>3</sub> P/NF | 3E <sup>a</sup><br>Potentiostatic<br>5400 s | -0.8 V and -1.1 V | NaH <sub>2</sub> PO <sub>2</sub> ·<br>H <sub>2</sub> O,<br>NaH <sub>2</sub> PO <sub>4</sub> | - | Ni foam | 19 |
|----------------------|---------------------------------------------|-------------------|---------------------------------------------------------------------------------------------|---|---------|----|

*3E = Three-electrode set-up*

*2E = Two-electrode set-up*

*a = Ag/AgCl; b = SCE; c = Hg/HgO*

**Table S2.** List of monometallic TMPs for bifunctional electrocatalysis and ZAB performance.

| <b>Catalyst</b>                                 | $\Delta E$<br>(V) | <sup>a</sup> OCV<br>(V) | <b>Specific capacity</b><br>(mA h g <sup>-1</sup> ) | <sup>b</sup> PPD<br>(mW cm <sup>-2</sup> ) | <b>Energy density</b><br>(mWh g <sup>-1</sup> <sub>zn</sub> ) | <b>Cyclic stability</b><br>(h) | <b>Ref.</b> |
|-------------------------------------------------|-------------------|-------------------------|-----------------------------------------------------|--------------------------------------------|---------------------------------------------------------------|--------------------------------|-------------|
| CoP@PNC                                         | 0.78              | -                       | 730.5 <sup>f</sup>                                  | 138.57                                     | -                                                             | 150 <sup>i</sup>               | 20          |
| Co <sub>2</sub> P@NPPC                          | 0.70              | 1.4                     | 797 <sup>f</sup>                                    | 226                                        | -                                                             | 160 <sup>f</sup>               | 21          |
| CoP@C/CNSs                                      | 0.79              | 1.49                    | 750.8 <sup>f</sup>                                  | 180.1                                      | 916                                                           | 80 <sup>f</sup>                | 22          |
| Co <sub>2</sub> P@NCNTs                         | 0.93              | 1.3                     | 792.6 <sup>f</sup>                                  | 159.7                                      | 921.2                                                         | 100 <sup>f</sup>               | 23          |
| Co <sub>2</sub> P@NCNT-4                        | 0.87              | -                       | 831.25 <sup>f</sup>                                 | 217                                        | -                                                             | 240 <sup>f</sup>               | 24          |
| H-CoP@NC                                        | -                 | 1.51                    | -                                                   | 152.94                                     | -                                                             | 123 <sup>j</sup>               | 25          |
| Co <sub>2</sub> P@NPCNTs                        | -                 | 1.43                    | -                                                   | 65.83                                      | -                                                             | 30 <sup>f</sup>                | 26          |
| CoP@NWC                                         | 0.65              | 1.50                    | 805.8 <sup>f</sup>                                  | 175                                        | -                                                             | 407 <sup>f</sup>               | 27          |
| Co <sub>x</sub> P@NPC                           | 0.75              | 1.43                    | -                                                   | 157                                        | -                                                             | 140 <sup>f</sup>               | 28          |
| CoP@CF-900                                      | -                 | 1.40                    | 776 <sup>f</sup>                                    | 150                                        | -                                                             | 150 <sup>f</sup>               | 29          |
| Co <sub>2</sub> P@CNF                           | -                 | 1.393                   | -                                                   | 121                                        | -                                                             | 23 <sup>f</sup>                | 30          |
| Co <sub>2</sub> P/NPG                           | 0.82              | 1.42                    | -                                                   | 103.5                                      | -                                                             | 55 <sup>c</sup>                | 31          |
| CoP/NP-HPC                                      | -                 | 1.4                     | -                                                   | 186                                        | -                                                             | 80 <sup>c</sup>                | 32          |
| Co <sub>2</sub> P@NC                            | 0.65              | 1.44                    | -                                                   | 81.3                                       | -                                                             | 283 <sup>f</sup>               | 33          |
| FeP@NPW                                         | 0.65              | 1.53                    | 811.7 <sup>e</sup>                                  | 162                                        | -                                                             | 339 <sup>e</sup>               | 34          |
| FeP@NPC-900                                     | 0.67              | 1.46                    | 785 <sup>j</sup>                                    | 190.15                                     | 706.5                                                         | 35 <sup>e</sup>                | 35          |
| FeP <sub>0.6</sub> @CNP100<br>0                 | -                 | 1.455                   | -                                                   | 80                                         | -                                                             | 58 <sup>f</sup>                | 36          |
| Fe <sub>2</sub> P/NPC                           | -                 | 1.4697                  | 654.1 <sup>f</sup>                                  | 111.16                                     | 733.6                                                         | -                              | 37          |
| FeP-NWCC                                        | 0.68              | 1.50                    | 805.6 <sup>f</sup>                                  | 144                                        | -                                                             | 450 <sup>f</sup>               | 38          |
| Fe-N <sub>4</sub> -Fe <sub>2</sub> P<br>NPs/NPC | -                 | 1.57                    | 729.5 <sup>f</sup>                                  | 140.3                                      | 817.9                                                         | 300 <sup>e</sup>               | 39          |
| Fe <sub>2</sub> P/NPCt                          | -                 | 1.402                   | 744.1 <sup>f</sup>                                  | 175.48                                     | 884.8                                                         | -                              | 40          |

|                                                 |     |       |                     |        |     |                  |    |
|-------------------------------------------------|-----|-------|---------------------|--------|-----|------------------|----|
| CV-<br>FeP/NPCNT-30                             | -   | 1.528 | 851.5 <sup>e</sup>  | 221    | -   | 78 <sup>e</sup>  | 41 |
| Vp-Ni <sub>2</sub> P@NC                         | 0.7 | 1.46  | -                   | 203.48 | -   | 150 <sup>f</sup> | 42 |
| Ni <sub>2</sub> P@NPC                           | 0.8 | 1.46  | 770.25 <sup>f</sup> | 162    | 692 | 100 <sup>e</sup> | 43 |
| Ni <sub>x</sub> P-NP-C                          | -   | -     | -                   | 266    | -   | 30 <sup>e</sup>  | 44 |
| NPO/Ni <sub>x</sub> P <sub>y</sub> @NF<br>-HPCs | -   | 1.441 | -                   | 337    | -   | 15 <sup>c</sup>  | 45 |

**Table S3.** List of multimetallic TMPs for bifunctional electrocatalysis and ZAB performance.

| Catalyst                                        | $\Delta E$<br>(V) | <sup>a</sup> OCV<br>(V) | Specific<br>capacity<br>(mA h g <sup>-1</sup> ) | <sup>b</sup> PPD<br>(mW cm <sup>-2</sup> ) | Energy<br>density<br>(mWh g <sup>-1</sup> <sub>zn</sub> ) | Cyclic<br>stability                                                                   | Ref. |
|-------------------------------------------------|-------------------|-------------------------|-------------------------------------------------|--------------------------------------------|-----------------------------------------------------------|---------------------------------------------------------------------------------------|------|
| FeCoP@NC                                        | 0.86              | 1.56                    | 793.6 <sup>f</sup>                              | 183.5                                      | -                                                         | 150 <sup>d</sup>                                                                      | 46   |
| FeCoP <sub>2</sub> -CNc                         | 0.81              | 1.41                    | 764.6 <sup>d</sup>                              | 122.5                                      | -                                                         | 45 <sup>d</sup>                                                                       | 47   |
| MoCoP-NPC                                       | 0.66              | 1.50                    | 829.6 <sup>g</sup>                              | 175.2                                      | 994.8                                                     | 300 <sup>f</sup>                                                                      | 48   |
| FeCoP/NPC                                       | 0.75              | 1.51                    | 807 <sup>e</sup>                                | 136                                        | -                                                         | 950 <sup>f</sup>                                                                      | 49   |
| CoFeP@C                                         | 0.86              | -                       | 783.6 <sup>f</sup>                              | 143.5                                      | -                                                         | 200 <sup>c</sup>                                                                      | 50   |
| CoP-NC@NFP                                      | 0.83              | 1.44                    | -                                               | 93                                         | -                                                         | 200 <sup>c</sup>                                                                      | 51   |
| Co <sub>2</sub> P-Fe <sub>2</sub> P             | 0.70              | 1.45                    | 728.8 <sup>f</sup>                              | 152                                        |                                                           | 47 <sup>f</sup>                                                                       | 52   |
| CoP/Ni <sub>2</sub> P                           |                   | 1.4                     |                                                 | 77                                         |                                                           | 33.3                                                                                  | 53   |
| FeNiP@C-200                                     | 0.70              | -                       | 786.2 <sup>f</sup>                              | 169                                        | -                                                         | 220 <sup>d</sup>                                                                      | 54   |
| FeNiP/NPCS                                      | 0.80              | 1.51                    | 602.7 <sup>f</sup>                              | 163                                        | 783.5                                                     | 110 <sup>f</sup>                                                                      | 55   |
| Cr-doped<br>Ni <sub>2</sub> P@NF                | -                 | 1.42                    | 767.8 <sup>e</sup>                              | 139                                        | 944.39                                                    | 208 <sup>e</sup>                                                                      | 56   |
| Cu-Co <sub>2</sub> P/CNFs                       |                   | 1.36                    |                                                 | 230                                        |                                                           | 80 h <sup>c</sup>                                                                     | 57   |
| W-Co <sub>2</sub> P/NC                          | 0.72              | 1.50                    | 881 <sup>f</sup>                                | 224.4                                      | 884                                                       | 130 <sup>f</sup>                                                                      | 58   |
| Cu-Co <sub>2</sub> P@2D-<br>NPC                 |                   | 1.40                    | 736.8 <sup>f</sup>                              | 236.1                                      | 950                                                       | 160                                                                                   | 59   |
|                                                 |                   |                         |                                                 |                                            |                                                           | (charge 2<br>mA cm <sup>-2</sup> )<br>and<br>Discharge<br>10 mA<br>cm <sup>-2</sup> ) |      |
| Mn(0.1)-<br>Co <sub>2</sub> P/NC                |                   | 1.35                    |                                                 | 40.44                                      |                                                           | 100<br>cycles <sup>g</sup>                                                            | 60   |
| Fe <sub>0.20</sub> Co <sub>0.80</sub> P<br>/PNC | 0.71              |                         |                                                 | 167                                        |                                                           | 92 <sup>c</sup>                                                                       | 61   |

**Table S4.** List of heterostructure TMPs for bifunctional electrocatalysis and ZAB performance.

| Catalyst                                             | $\Delta E$<br>(V) | <sup>a</sup> OCV<br>(V) | Specific<br>capacity<br>(mA h g <sup>-1</sup> ) | <sup>b</sup> PPD<br>(mW cm <sup>-2</sup> ) | Energy<br>density<br>(mWh g <sup>-1</sup> <sub>zn</sub> ) | Cyclic<br>stability                              | Ref. |
|------------------------------------------------------|-------------------|-------------------------|-------------------------------------------------|--------------------------------------------|-----------------------------------------------------------|--------------------------------------------------|------|
| CoP/FeP@PCN                                          | 0.56              | 1.52                    | 780 <sup>f</sup>                                | 175.4                                      |                                                           | 579 <sup>e</sup>                                 | 62   |
| CoP@Co <sub>2</sub> P/NP                             | 0.78              | 1.56                    | 689 <sup>e</sup>                                | 215.1                                      |                                                           | 580 <sup>e</sup>                                 | 63   |
| C                                                    |                   |                         |                                                 |                                            |                                                           |                                                  |      |
| Fe-P/Cu <sub>3</sub> P-NPC                           | 0.74              | 1.39                    | 815.3 <sup>f</sup>                              | 158.5                                      |                                                           | 366 <sup>b</sup>                                 | 64   |
| FeP/Fe <sub>2</sub> P-NSPC                           |                   | 1.41                    | 702 <sup>f</sup>                                | 91                                         | 737                                                       |                                                  | 65   |
| CoP/Co <sub>2</sub> P/Co <sub>3</sub> O <sub>4</sub> |                   | 1.43                    | 710 <sup>f</sup>                                | 64.4                                       |                                                           | 33.3 <sup>f</sup>                                | 66   |
| Cu <sub>3</sub> P/CoP@NC                             |                   | 1.42                    | 765.6 <sup>f</sup>                              | 209                                        |                                                           | 317 <sup>e</sup>                                 | 67   |
| Cu <sub>3</sub> P/MoP@C                              | -                 | 1.51                    | 704 <sup>f</sup>                                | 156                                        | -                                                         | 231 <sup>e</sup>                                 | 68   |
| CoP/Co <sub>2</sub> P@CN                             | 0.68              | 1.38                    | 740.5 <sup>f</sup>                              | 221                                        |                                                           | 900 <sup>e</sup>                                 | 69   |
| S                                                    |                   |                         |                                                 |                                            |                                                           |                                                  |      |
| CoP <sub>3</sub> /CeO <sub>2</sub> /C                |                   | 1.343                   | 767.7 <sup>e</sup>                              | 150                                        | 871.3                                                     | 120 <sup>e</sup>                                 | 70   |
| Co <sub>3</sub> O <sub>4</sub> @Ni <sub>2</sub> P    |                   | 1.35                    |                                                 | 182.8                                      |                                                           | 177 <sup>f</sup>                                 | 71   |
| CoP <sub>3</sub> /CoSnO <sub>2</sub>                 |                   | 1.36                    |                                                 | 135                                        |                                                           | 120 <sup>e</sup>                                 | 72   |
| Cu <sub>3</sub> P/TiO <sub>2</sub> @NC               |                   | 1.30                    | 747.3 <sup>f</sup>                              | 182.9                                      |                                                           | 220 <sup>e</sup><br>(using<br>RuO <sub>2</sub> ) | 73   |
| CoP/CoO@MN<br>C-CNT                                  |                   | 1.40                    | 724.6 <sup>f</sup>                              | 152.8                                      |                                                           | 500h <sup>f</sup>                                | 74   |
| NiCoP/NiO                                            | -                 | 1.43                    | 704.9 <sup>f</sup>                              | 74.74                                      | -                                                         | 182 <sup>e</sup>                                 | 75   |
| NiCoP@CoNi-<br>LDH/SSM                               | 0.57              | 1.25                    | 678.7 <sup>f</sup>                              | 53.4                                       |                                                           | 1505 <sup>e</sup>                                | 76   |
| NiCoP/NiFe<br>LDH@CC                                 | -                 | 1.43                    | -                                               | 184                                        | -                                                         | 238 <sup>f</sup>                                 | 77   |
| FeCo-<br>NC@Co <sub>2</sub> P-NC                     | 0.674             | 1.47                    | 881.3 <sup>f</sup>                              | 159.3                                      |                                                           | 280 cycles                                       | 78   |



|                                                        |       |       |                    |        |       |                   |    |
|--------------------------------------------------------|-------|-------|--------------------|--------|-------|-------------------|----|
| CoNiP/PNC                                              | 0.86  | 1.44  | 729.3 <sup>f</sup> | 171    |       | 57 <sup>f</sup>   | 79 |
| FeCo-rich phosphides@N, P-doped carbon                 | 0.73  | 1.57  |                    | 174    |       | 720 <sup>f</sup>  | 80 |
| H-CNP@M                                                | 0.691 | 1.44  | 801 <sup>f</sup>   | 166.5  |       | 120 <sup>f</sup>  | 81 |
| Co <sub>2</sub> P/Co <sub>3</sub> Fe <sub>7</sub> @N-C | 0.66  | 1.48  | 858 <sup>f</sup>   | 151.6  |       | 266 <sup>c</sup>  | 82 |
| Fe <sub>2</sub> P/Co@NPC                               | 0.685 |       |                    | 233.56 |       | 180 <sup>e</sup>  | 83 |
| Co/Co <sub>2</sub> P@NPC NTs                           | 0.66  | 1.465 |                    | 189.7  |       | 200 <sup>f</sup>  | 84 |
| Co/Co <sub>2</sub> P@NCN T                             | 0.68  | 1.45  |                    | 330    |       | 1080 <sup>e</sup> | 85 |
| Co <sub>2</sub> P/Co-NC                                | 0.72  | 1.45  | 837 <sup>f</sup>   | 187    |       | 140 <sup>e</sup>  | 86 |
| Ni/Ni <sub>12</sub> P <sub>5</sub> @CN <sub>x</sub>    | 0.66  | 1.41  | 710 <sup>h</sup>   | 181    |       | 1000 cycles       | 87 |
| Co <sub>2</sub> P/Co@N-CNT/NPG                         | 0.82  | 1.45  | 781 <sup>f</sup>   | 145    | 987.2 | 800 <sup>f</sup>  | 88 |
| Cu/Cu <sub>3</sub> P@NP-C-900                          |       | 1.42  | 795.5 <sup>e</sup> | 148.2  | 936.8 |                   | 89 |
| Co <sub>2</sub> P/Co-N-C                               |       | 1.5   | 803 <sup>f</sup>   | 158    |       |                   | 90 |

<sup>a</sup> open circuit voltage; <sup>b</sup> peak power density; <sup>c</sup> at 2 mA cm<sup>-2</sup>; <sup>d</sup> at 3 mA cm<sup>-2</sup>; <sup>e</sup> at 5 mA cm<sup>-2</sup>  
<sup>f</sup> at 10 mA cm<sup>-2</sup>; <sup>g</sup> at 20 mA cm<sup>-2</sup>; <sup>h</sup> at 25 mA cm<sup>-2</sup>; <sup>i</sup> at 30 mA cm<sup>-2</sup>; <sup>j</sup> at 50 mA cm<sup>-2</sup>

## References

1. N. Khodayar, A. Noori, M. S. Rahmanifar, M. Moloudi, N. Hassani, M. N. Amal, M. F. E. Kady, N. B. Mohamed, X. Xia, Y. Zhang, R. B. Kaner and M. F. Mousavi, *Energy Environ. Sci.*, 2024, **17**, 5200-5215.
2. K. Jiang, J. Li, Z. Zheng, T. Zhang, G. Wang, C. Shi and X. Hou, *ACS Appl. Energy Mater.*, 2024, **7**, 7895–7905.
3. G. B. Darband, M. Aliofkhazraei, S. Hyun and S. Shanmugam, *ACS Appl. Mater. Interfaces*, 2020, **12**, 53719–53730.
4. A. Li, D. Song, R. Cao, F. Wang, H. Yana and H. Chen, *Chem. Commun.*, 2024, **60**, 3838-3841.
5. G. B. Darband, N. Lotfi, A. Aliabadi, S. Hyun and S. Shanmugam, *Electrochim. Acta*, 2021, **382**, 138335.
6. J. Wang, Y. Zhang, W. Zhang, Q. Zhao, J. Li and G. Liu, *Electrochim. Acta*, 2023, **438**, 141563.
7. Z. P. Lu and L. Sepunaru, *Electrochim. Acta*, 2020, **363**, 137167.
8. A. B. Silva, M. Medina, L. A. Goulart and L. H. Mascaro, *Electrochim. Acta*, 2024, **475**, 143679.
9. G. B. Darband, M. Maleki, A. Toghraei and S. Shanmugam, *Int. J. Hydrogen Energy*, 2023, **48**, 4253-4263.
10. Y. Zhang, Y. Qiao and Y. Wu, *J. Electroanal. Chem.*, 2024, **975**, 118793.
11. Y. S. Park, W. S. Choi, M. J. Jang, J. H. Lee, S. Park, H. Jin, M. H. Seo, K. H. Lee, Y. Yin, Y. Kim, J. Yang and S. M. Choi, *ACS Sustainable Chem. Eng.*, 2019, **7**, 10734–10741.
12. A. Toghraei, T. Shahrabi and G. B. Darband, *Electrochim. Acta*, 2020, **335**, 135643.
13. J. Wang, L. Zhu, G. Dharan and G. W. Ho, *J. Mater. Chem. A*, 2017, **5**, 16580-16584.
14. V. T. Chebrolu, B. Balakrishnan, S. A. Raja, I. Cho, J. S. Bak and H. J. Kim, *New J. Chem.*, 2020, **44**, 7690-7697.
15. K. Mondal, N. Sathithsukanoh and S. B. Lalvani, *SN Appl. Sci.*, 2020, **2**, 2155.
16. Y. Xiong, X. Zhao, D. Wei, H. Liu and S. Mahmud, *J. Solid State Chem.*, 2024, **339**, 124958.
17. J. Liu, G. Chen, J. Xiao and Y. Zhang, *Int. J. Hydrogen Energy*, 2024, **62**, 803-811.
18. Z. Kayış and D. Akyüz, *Phys. Chem. Chem. Phys.*, 2024, **26**, 14908-14918.
19. W. Fu, G. Meng, D. Yin, X. Zhang, Y. Shi, Z. Yang, D. Chang, P. Chen and L. Zhang, *J. Environ. Chem. Eng.*, 2024, **12**, 114815.

20. Y. Li, Y. Liu, Q. Qian, G. Wang and G. Zhang, *Energy Storage Mater.*, 2020, **28**, 27-36.
21. Y. Liu, C. Li, M. Yuan, X. Zhang, H. Lan, Y. Chen, M. Tian, K. Liu and L. Wang, *Catal. Sci. Technol.*, 2023, **13**, 3084-3093.
22. M. Liu, X. Lv, Z. Mi, S. Chen, J. Li, J. Wu, T. Sun, L. Zhang and J. Zhang, *ACS Appl. Energy Mater.*, 2023, **86**, 7317-7322.
23. X. Peng, Y. Liu, S. Hu, P. Zheng, Y. Fu, P. Dong, J. Xiao, L. Han and Y. Zhang, *J. Alloys Compd.*, 2021, **889**, 161628.
24. X. Peng, X. Xian, L. Han, Y. Liu, P. Zheng, Y. Fu, P. Dong, X. Zeng and Y. Zhang, *ACS Appl. Nano Mater.*, 2023, **6**, 2027-2034.
25. L. Gan, J. Liu, L. Han, J. Li, J. Zhao, K. Chen, D. Jiang and Y. Ren, *Int. J. Hydrogen Energy.*, 2024, **51**, 1391-1399.
26. Q. Shao, T. Li, H. G. Wang, Y. Li, Z. Si and Q. Duan, *CrystEngComm.*, 2021, **23**, 1013-1018.
27. X. Wu, T. Zhou, T. Teng, S. Liu, B. Lu, S. Mehdi, Y. Liu, J. Jiang, Y. Wang and B. Li, *Green Chem.*, 2024, **26**, 6520-6531.
28. Q. Shi, Q. Liu, Y. Zheng, Y. Dong, L. Wang, H. Liu and W. Yang, *Energy Environ. Mater.*, 2022, **5**, 515-523.
29. J. Hu, Y. Qin, H. Sun, Y. Ma, L. Lin, Y. Peng, J. Zhong, M. Chen, X. Zhao, Z. Deng, *Small*, 2022, **18**, 2106260.
30. J. Gao, J. Wang, L. Zhou, X. Cai, D. Zhan, M. Hou and L. Lai, *ACS Appl. Mater. Interfaces*, 2019, **11**, 10364-10372.
31. Q. Shao, Y. Li, X. Cui, T. Li, H. G. Wang, Y. Li, Q. Duan and Z. Si, *ACS Sustainable Chem. Eng.*, 2020, **8**, 6422-6432.
32. Y. Wang, M. Wu, J. Li, H. Huang and J. Qiao, *J. Mater. Chem. A*, 2020, **8**, 19043-19049.
33. X. W. Lv, W. S. Xu, W. W. Tian, H. Y. Wang and Z. Y. Yuan, *Small*, 2021, **17**, 2101856.
34. X. Wu, T. Zhou, G. Han, S. Liu, M. Cao, S. Li, J. Wang, Y. Liu, J. Jiang, Y. Wang and B. Li, *Sustain. Energy Fuels.*, 2024, **8**, 1983-1991.
35. M. M. Kumar and C. R. Raj, *ACS Appl. Mater. Interfaces*, 2022, **14**, 15176-15186.
36. Y. G. Kang, P. Yan, W. W. Yang and B. B. Chen, *J. Electroanal. Chem.*, 2022, **909**, 116122.
37. L. Chen, Y. Zhang, L. Dong, X. Liu, L. Long, S. Wang, C. Liu, S. Dong and J. Jia, *Carbon*, 2020, **158**, 885-892
38. P. X. Zhang, Y. Y. Liu, S. L. Wang, L. M. Zhou, T. Liu, K. Sun, H. Q. Cao, J. C. Jiang, X. L. Wu and B. J. Li, *Small*, 2022, **18**, 2202725

39. H. Wang, T. C. Yang, H. Zheng, Z. Jiang, C. M. Yang and N. C. Lai, *J. Colloid Interface Sci.*, 2025, **678**, 806-817.
40. R. Wang, Y. Yuan, X. Zhong, Y. Zhu, J. Liu, Y. Xie, S. Zhong and Z. Xu, *J. Electrochem. Soc.*, 2022, **169**, 066509.
41. B. Chen, M. Zhou, N. Zhang, X. Deng and H. H. Yang, *Inorg. Chem. Front.*, 2024, **11**, 2690-2701.
42. X. Guo, C. Lv, Y. Wang, T. Wang, X. Gan, L. Li and X. Lv, *Chem. Eur. J.*, 2023, **29**, 2023-2182.
43. C. R. Raj, M. M. Kumar and R. Singh, *Chem. Asian J.*, 2024, e202400684.
44. Y. Wang, J. Liu, T. Lu, R. He, N. Xu and J. Qiao, *Appl. Catalysis B: Environ.*, 2023, **321**, 122041.
45. R. He, T. Lu, N. Xu, G. Liu, Y. Zhang and J. Qiao, *Chem. Eng. J.*, 2023, **461**, 141843.
46. J. Liu, Z. Luo, J. Wu, D. Qian, W. Liao, G. I. N. Waterhouse and X. Chen, *Inorg. Chem.*, 2024, **63**, 12681-12689.
47. R. Liu, Y. Wang, W. Zheng, H. Zhang and Z. Zhang, *Energy Fuels*, 2023, **37**, 1344-1352.
48. S. Zhao, S. Ran, N. Shi, M. Liu, W. Sun, Y. Yu and Z. Zhu, *Small*, 2023, **19**, 2302414.
49. H. Chen, Y. Liu, B. Liu, M. Yang, H. Li and H. Chen, *Nanoscale*, 2022, **14**, 12431-12436.
50. L. Gao, S. Chang and Z. Zhang, *ACS Appl. Mater. Interfaces*, 2021, **13**, 22282-22291.
51. E. Vijayakumar, S. Ramakrishnan, C. Sathiskumar, D. J. Yoo, J. Balamurugan, H. S. Noh, D. Kwon, Y. H. Kim and H. Lee, *Chem. Eng. J.*, 2022, **428**, 131115.
52. W. Jin, X. Lu, Y. Wang, W. Xiao and X. Zhang, *Int. J. Hydrogen Energy*, 2023, **48**, 25250-25262.
53. X. Lv, W. Tian, Y. Liu and Z. Y. Yuan, *Mater. Chem. Front.*, 2019, **3**, 2428-2436.
54. W. Chen, S. Chang, H. Yu, W. Li, H. Zhang and Z. Zhang, *Nanoscale*, 2021, **13**, 17136-17146.
55. J. T. Ren, Y. S. Wang, L. Chen, L. J. Gao, W. W. Tian and Z. Y. Yuan, *Chem. Eng. J.*, 2020, **389**, 124408.
56. X. Hu, G. Luo, X. Guo, Q. Zhao, R. Wang, G. Huang, B. Jiang, C. Xu and F. Pan, *Sci. Bull.*, 2021, **66**, 708-719.
57. X. Sun, H. Liang, H. Yu, J. Bai and C. Li, *Nanotechnology*, 2022, **33**, 135202.
58. M. Ding, X. Hui and L. Yin, *Electrochim. Acta*, 2023, **468**, 142891.
59. L. Diao, T. Yang, B. Chen, B. Zhang, N. Zhao, C. Shi, E. Liu, L. Ma and C. He, *J. Mater. Chem. A*, 2019, **7**, 21232-21243.

60. J. Tong, H. Wang, L. Bo, C. Li, X. Guan, D. Kong, Y. Zhang, W. Shi and Z. Lei, *Mater. Res. Bull.*, 2022, **147**, 111638.
61. X. W. Gao, J. J. Mu, R. Wei, X. Wang, Q. Gu, L. K. Zhao and W. B. Luo, *Small Methods*, 2024, **8**, 2301645.
62. K. Chen, L. Wang, J. Long, F. Zhao and L. Kang, *Chem. Eng. J.*, 2024, **496**, 153820.
63. Z. Li, Y. Zeng, D. Xiong, L. Zhou, J. Zhou, Y. Yang, F. Zhan, K. Wang, Y. Du and Y. Liu, *Inorg. Chem. Front.*, 2024, **11**, 549-561.
64. X. Yang, F. Wang, Z. Jing, M. Chen, B. Wang, L. Wang, G. Qu, Y. Kong and L. Xu, *Small*, 2023, **19**, 2301985.
65. J. Zou, M. Zheng, H. Wu, Z. Pan, J. Xu, X. Zeng, T. Lan, Y. Yao, Z. Li, *J. Energy Storage*, 2023, **70**, 107950.
66. W. Zou, J. Xiang and H. Tang, *New J. Chem.*, 2022, **46**, 8786-8793.
67. M. Guo, L. Wang, Z. Huang, H. Li, T. T. Isimjan and X. Yang, *ACS Nano*, 2024, **18**, 17901-17912.
68. M. Guo, M. Xu, Y. Qu, C. Hu, P. Yan, T. T. Isimjan and X. Yang, *Appl. Catal. B*, 2021, **297**, 120415.
69. Y. Liu, J. Gao, M. Yuan, H. Li, Y. Chen, Y. Du, Z. Xiao, K. Liu and L. Wang, *Inorg. Chem.*, 2024, **63**, 7926-7936.
70. J. Li, Y. Kang, Z. Lei and P. Liu, *Appl. Catal. B*, 2023, **321**, 122029.
71. X. Hu, T. Yang, Z. Yang, Z. Li, R. Wang, M. Li, G. Huang, B. Jiang, C. Xu and F. Pan, *J. Mater. Sci.*, 2022, **115**, 19-28.
72. B. Li, H. Xue, H. Pang and Q. Xu, *Sci. China Chem.*, 2020, **63**, 475-482.
73. M. Guo, Z. Huang, Y. Qu, L. Wang, H. Li, T. T. Isimjan and X. Yang, *Appl. Catal. B*, 2023, **320**, 121991.
74. H. W. Go, T. T. Nguyen, Q. P. Ngo, R. Chu, N. H. Kim and J. H. Lee, *Small*, 2023, **19**, 2206341.
75. X. Hu, J. Fan, R. Wang, M. Li, S. Sun, C. Xu and F. Pan, *Green Energy Environ.*, 2023, **8**, 601-611.
76. J. Jian, Z. Wang, Y. Qiao, S. Gao, M. Wang, L. Chang, H. Wang and P. Nie, *Green Chem.*, 2024, **26**, 6713-6722.
77. X. L. Hu, J. C. Fan, X. Li, Z. K. Wu, Y. Y. Li and C. H. Xu, *Rare Met.*, 2024, **43**, 4961-4972.
78. T. Yu, X. Cao, R. Song, L. Li, X. Dong, J. Li, X. Wang, X. Zhou, N. Yuan and J. Ding, *J. Alloys Compd.*, 2023, **939**, 168679.

79. W. Sun, Y. Xu, P. Yin and Z. Yang, *Appl. Surf. Sci.*, 2021, **554**, 149670.
80. B. Wang, Q. Liu, A. Yuan, Q. Shi, L. Jiang, W. Yang, T. Yang and X. Hou, *J. Mater. Sci.*, 2024, **182**, 1-11.
81. J. Qiao, Z. Bao, L. Kong, X. Liu, C. Lu, M. Ni, W. He, M. Zhou, Z. M. Sun, *Chinese Chem. Lett.*, 2023, **34**, 108318.
82. A. Feng, L. Liu, P. Liu, Y. Zu, F. Han, X. Li, S. Ding and Y. Chen, *Mater. Today Energy*, 2024, 44, 101626.
83. Y. Bai, Y. Wang, Z. Qiao, Y. Yang, L. Deng, C. Li, X. Chen, S. Wang, Y. Huang, X. Zhang and D. Cao, *J. Mater. Chem. A*, 2022, **10**, 16037-16045.
84. H. Yang, B. Wang, S. Kou, G. Lu and Z. Liu, *Chem. Eng. J.*, 2021, **425**, 131589.
85. M. Wu, G. Zhang, N. Chen, Y. Hu, T. Regier, D. Rawach and S. Sun, *ACS Energy Lett.*, 2021, **6**, 1153-1161.
86. X. Liu, J. Wu, Z. Luo, P. Liu, Y. Tian, X. Wang and H. Li, *ACS Appl. Mater. Interfaces*, 2023, **15**, 9240-9249.
87. Z. Yang, X. Xie, J. Wei, Z. Zhang, C. Yu, S. Dong, B. Chen, Y. Wang, M. Xiang and H. Qin, *J. Colloid Interface Sci.*, 2023, **642**, 439-446.
88. Q. P. Ngo, T. T. Nguyen, M. Singh, N. H. Kim and J. H. Lee, *J. Mater. Chem. A*, 2024, **12**, 1185-1199.
89. Y. Huang, F. Kong, F. Pei, L. Wang, X. Cui and J. Shi, *EcoMat*, 2023, **5**, e12335.
90. Q. Xu, X. Peng, Z. Zhu, K. Luo, Y. Liu and D. Yuan, *Int. J. Hydrogen Energy*, 2022, **47**, 16518-16527.
